# Supplementary material
Source: PubMed Central journal article supplement (PMC4301171)
Supplement: JVI.02378-14_zjv999099924so1.pdf [file JVI.02378-14_zjv999099924so1.pdf]

Supplemental Material for

## **Polyreactivity and Autoreactivity among HIV-1 Antibodies**

Mengfei Liu<sup>a\*</sup>, Guang Yang<sup>b</sup>, Kevin Wiehe<sup>c</sup>, Nathan I. Nicely<sup>c</sup>, Nathan A. Vandergrift<sup>c</sup>, Wes Rountree<sup>c</sup>, Mattia Bonsignori<sup>c,d</sup>, S. Munir Alam<sup>c</sup>, Jingyun Gao<sup>a†</sup>, Barton F. Haynes<sup>b,c,d</sup>, and Garnett Kelsoe<sup>b,c#</sup>

School of Medicine<sup>a</sup>; Department of Immunology<sup>b</sup>; Human Vaccine Institute<sup>c</sup>, and Department of Medicine<sup>d</sup>, Duke University, Durham, North Carolina, USA

Running Head: Poly- and Autoreactivity of HIV-1 Antibodies

#Address correspondence to Garnett Kelsoe, ghkelsoe@duke.edu.

\*Present address: Mengfei Liu, Hospital of the University of Pennsylvania, Philadelphia, Pennsylvania

†Present address: Jingyun Gao, University of Chicago Medical Center, Chicago, Illinois

M.L. and G.Y. contributed equally to this work.

Table 1: bNAbs\*

| Viral Epitope | Clonal Family |          | bNAb or nNAb | V <sub>H</sub> | HCDR3 Length | V <sub>H</sub> Mut (%nt) | Isotype | V <sub>L</sub> | LCDR3 Length | V <sub>L</sub> Mut (%nt) | Source                         | Derived       | Neutralization Breadth <sup>†</sup> | Neutralization Potency <sup>‡</sup> | Auto- or polyreactivity <sup>**</sup> | References  |
|---------------|---------------|----------|--------------|----------------|--------------|--------------------------|---------|----------------|--------------|--------------------------|--------------------------------|---------------|-------------------------------------|-------------------------------------|---------------------------------------|-------------|
| CD4bs         | VRC01-03      | VRC01    | bNAb         | 1-2            | 14           | 32                       | IgG1    | K3-20          | 5            | 17                       | chronic infection 45           | rAb           | ++++                                | +++                                 | Autoreactive (UBE3A)                  | (1)         |
|               |               | VRC02    | bNAb         | 1-2            | 14           | 32                       | IgG1    | K3-20          | 5            | 19                       |                                |               | ++++                                | +++                                 | -                                     | (1)         |
|               |               | VRC03    | bNAb         | 1-2            | 16           | 30                       | IgG1    | K3-20          | 5            | 20                       |                                |               | ++++                                | +++                                 | -                                     | (1)         |
|               |               | VRC07    | bNAb         | 1-2            | 16           | 35.7                     | IgG1    | K3-20          | 5            | 17                       |                                |               | ++++                                | +++                                 | Polyreactive                          | (2, 3)      |
|               |               | NIH45-46 | bNAb         | 1-2            | 16           | 30                       | IgG1    | K3-20          | 5            | --                       |                                |               | ++++                                | +++                                 | Polyreactive                          | (4)         |
|               | CH98          | CH98     | bNAb         | 3-30           | 21           | 25.3                     | IgG1    | L2-23          | 5            | 16                       | chronic infection w SLE CH5329 | rAb           | ++                                  | NR                                  | Polyreactive                          | (5)         |
|               | VRC-CH30-34   | CH31     | bNAb         | 1-2            | 13           | 24                       | IgG1    | K1-33          | 5            | 15                       | chronic infection 0219         | rAb           | +++                                 | +++                                 | Polyreactive                          | (6, 7)      |
|               | CH103-106     | CH103    | bNAb         | 4-59           | 15           | 15.1                     | IgG1    | L3-1           | 10           | 12                       | Infected CH505                 | rAb           | ++                                  | ++                                  | Polyreactive                          | (8)         |
| CH106         |               | bNAb     | 4-59         | 15             | 16           | IgG1                     | L3-1    | 10             | 11.2         | ++                       |                                |               | ++                                  | Polyreactive                        | (8)                                   |             |
| MPER          | 2F5           | 2F5      | bNAb         | 2-5            | 22           | 14                       | IgG3    | K1-13          | 9            | 11.8                     | Infected                       | hybridoma/rAb | ++                                  | ++                                  | Autoreactive (KYNU, CMTM3)            | (9, 10)     |
|               | 4E10          | 4E10     | bNAb         | 1-69           | 18           | 14                       | IgG3    | K3-20          | 9            | 10.5                     | Infected                       | hybridoma/rAb | ++++                                | ++                                  | Polyreactive                          | (10-12)     |
|               | 10E8          | 10E8     | bNAb         | 3-15           | 20           | 21                       | IgG3    | L3-19          | 12           | 14                       | Infected N152                  | rAb           | ++++                                | +++                                 | Autoreactive (FAM84A)                 | (13)        |
|               | CAP206-CH12   | CH12     | bNAb         | 1-69           | 15           | 12                       | IgG1    | K3-20          | 11           | 5                        | Chronic infection CAP206       | rAb           | +                                   | ++                                  | -                                     | (12)        |
| V1V2-glycan   | PG9, PG16     | PG9      | bNAb         | 3-33           | 28           | 14.9                     | IgG1    | L2-14          | 11           | 10.1                     | Chronic infection              | rAb           | +++                                 | +++                                 | Polyreactive                          | (14-16)     |
|               |               | PG16     | bNAb         | 3-33           | 28           | 14.5                     | IgG1    | L2-14          | 11           | 12.5                     |                                |               | +++                                 | +++                                 | -                                     | (14-16)     |
|               | CH01-04       | CH01     | bNAb         | 3-20           | 24           | 13.3                     | IgG1    | K3-20          | 9            | 10                       | Chronic infection CH0219       | rAb           | +                                   | ++                                  | -                                     | (17)        |
|               |               | CH03     | bNAb         | 3-20           | 24           | 12                       | IgG1    | K3-20          | 9            | 10.6                     |                                |               | +                                   | ++                                  | -                                     | (17)        |
|               | PGT141-145    | PGT145   | bNAb         | 1-8            | 31           | 18                       | NR      | K2-28          | 9            | 16                       | chronic infection 84           | rAb           | +++                                 | +++                                 | -                                     | (18)        |
| V3-glycan     | 2G12          | 2G12     | bNAb         | 3-21           | 14           | 21                       | IgG1    | K1-5           | 9            | 18.4                     | Infected                       | hybridoma/rAb | +                                   | ++                                  | -                                     | (9, 19, 20) |
|               | PGT121-123    | PGT121   | bNAb         | 4-59           | 24           | 17                       | NR      | L3-21          | 12           | 18                       | chronic infection 17           | rAb           | ++                                  | ++++                                | -                                     | (18)        |
|               | PGT125-131    | PGT125   | bNAb         | 4-39           | 19           | 20                       | NR      | L2-8           | 10           | 15                       | chronic infection 36           | rAb           | ++                                  | ++++                                | Polyreactive                          | (18)        |
|               |               | PGT128   | bNAb         | 4-39           | 19           | 19                       | NR      | L2-8           | 10           | 14                       |                                |               | ++                                  | ++++                                | Polyreactive                          | (18)        |

Table 2: nNAb\*s

| Viral Epitope    | Clonal Family |              | bNAb or nNAb | V <sub>H</sub> | HCDR3 Length | V <sub>H</sub> Mut (%nt)                  | Isotype | V <sub>L</sub> | LCDR3 Length | V <sub>L</sub> Mut (%nt)                  | Source                | Derived | Neutralization Breadth <sup>†</sup> | Neutralization Potency <sup>‡</sup> | Auto- or polyreactivity <sup>**</sup> | References                          |
|------------------|---------------|--------------|--------------|----------------|--------------|-------------------------------------------|---------|----------------|--------------|-------------------------------------------|-----------------------|---------|-------------------------------------|-------------------------------------|---------------------------------------|-------------------------------------|
| <b>V2 linear</b> | <b>CH58</b>   | <b>CH58</b>  | nNAb         | 5-51           | 19           | 1.8                                       | IgG1    | 6-57           | 9            | 1.8                                       | RV144 vaccinee 347759 | rAb     | -                                   | -                                   | -                                     | (21)                                |
| <b>V2 linear</b> | <b>CH59</b>   | <b>CH59</b>  | nNAb         | 3-9            | 13           | 2.8                                       | IgG1    | 3-10           | 11           | 0.9                                       |                       | rAb     | -                                   | -                                   | -                                     | (21)                                |
| <b>V2</b>        | <b>HG107</b>  | <b>HG107</b> | nNAb         | 3-9            | 14           | 2.3                                       | IgG1    | 3-10           | 10           | 0.9                                       | RV144 vaccinee 200134 | rAb     | -                                   | -                                   | -                                     | (21)                                |
| <b>V2</b>        | <b>HG131</b>  | <b>HG131</b> | nNAb         | 3-30           | 13           | 5.2%                                      | IgG1    | L3-25          | 10           | 2.9%                                      | RV144 vaccinee 302689 | rAb     | -                                   | -                                   | Polyreactive                          | Bonsignori <i>et al</i> unpublished |
| <b>V3 loop</b>   | <b>F39F</b>   | <b>F39F</b>  | nNAb         |                |              |                                           |         |                |              |                                           | Infected              |         | -                                   | -                                   | Autoreactive (PACRG1)                 | (22)                                |
| <b>V3 loop</b>   | <b>19b</b>    | <b>19b</b>   | nNAb         |                |              |                                           | IgG1    |                |              |                                           | Infected N70          | EBV     | -                                   | -                                   | -                                     | (23, 24)                            |
| <b>C1</b>        | <b>A32</b>    | <b>A32</b>   | nNAb         | 4-30           | 15           | 10.3%                                     | IgG1    | L2-8           | 10           | 5.1%                                      | Infected              |         |                                     | -                                   | -                                     | (25)                                |
| <b>CD4i</b>      | <b>17b</b>    | <b>17b</b>   | nNAb         | 1-69           | 19           | 27 (V <sub>JH</sub> and V <sub>JL</sub> ) | IgG1    | K2             | 12           | 27 (V <sub>JH</sub> and V <sub>JL</sub> ) | Infected              |         |                                     | -                                   | -                                     | (22)                                |
| <b>CD4i</b>      | <b>48d</b>    | <b>48d</b>   | nNAb         | 1-24           | 10           | 23 (V <sub>JH</sub> and V <sub>JL</sub> ) | IgG1    | K19            | 8            | 23 (V <sub>JH</sub> and V <sub>JL</sub> ) | Infected              |         |                                     | -                                   | -                                     | (22)                                |

\*Adapted from (26).

<sup>†</sup> Adapted from (26). Breadth indicated for Abs tested on large panels of >100 tier 2 Env pseudoviruses. Values indicate percentage of viruses that were neutralized at an IC<sub>50</sub> < 50 µg/ml: +++++ ≥90%; +++ = 75-90%; ++ = 50-74%; + ≤50%; - indicates no neutralization of diverse tier 2 viruses.

<sup>‡</sup> Adapted from (26). Potency indicated by mean IC<sub>50</sub> (µg/ml) of neutralized viruses: +++++, <0.05; +++ = 0.05-0.49; ++ = 0.5-4.9; + = 5.0-50.

\*\*Polyreactivity and Autoreactivity determined using protein microarray (Figs. 5, 6). Polyreactive Abs bind all array proteins on average >2-fold more avidly than control 151K (PI > 0.21); autoreactive Abs are not polyreactive (PI ≤ 0.21), but bind specific array proteins ≥500-fold stronger than 151K.

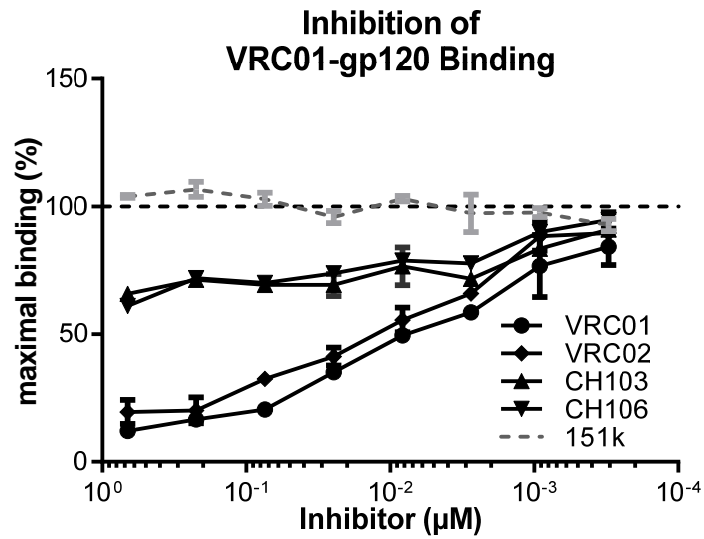

Fig. S1. Inhibition of VRC01 binding to gp120 by VRC01, VRC02, CH106, CH103, and 151K assessed in ELISA as described in Materials and methods. The y-axis indicates OD percentage of maximal binding, which is determined as the mean reading without inhibitors (dashed line). X-axis depicts molar concentration of inhibitor bNAbs. Error bars indicate standard deviation.

## Supplemental References

1. **Wu X, Yang Z-Y, Li Y, Hogerkorp C-M, Schief WR, Seaman MS, Zhou T, Schmidt SD, Wu L, Xu L, Longo NS, McKee K, O'Dell S, Louder MK, Wycuff DL, Feng Y, Nason M, Doria-Rose N, Connors M, Kwong PD, Roederer M, Wyatt RT, Nabel GJ, Mascola JR.** 2010. Rational Design of Envelope Identifies Broadly Neutralizing Human Monoclonal Antibodies to HIV-1. *Science* **329**:856-861.
2. **Balazs AB, Ouyang Y, Hong CM, Chen J, Nguyen SM, Rao DS, An DS, Baltimore D.** 2014. Vectored immunoprophylaxis protects humanized mice from mucosal HIV transmission. *Nat Med* **20**:296-300.
3. **Rudicell RS, Kwon YD, Ko SY, Pegu A, Louder MK, Georgiev IS, Wu X, Zhu J, Boyington JC, Chen X, Shi W, Yang ZY, Doria-Rose NA, McKee K, O'Dell S, Schmidt SD, Chuang GY, Druz A, Soto C, Yang Y, Zhang B, Zhou T, Todd JP, Lloyd KE, Eudailey J, Roberts KE, Donald BR, Bailer RT, Ledgerwood J, Mullikin JC, Shapiro L, Koup RA, Graham BS, Nason MC, Connors M, Haynes BF, Rao SS, Roederer M, Kwong PD, Mascola JR, Nabel GJ.** 2014. Enhanced Potency of a Broadly Neutralizing HIV-1 Antibody In Vitro Improves Protection against Lentiviral Infection In Vivo. *J Virol* **88**:12669-12682.
4. **Scheid JF, Mouquet H, Ueberheide B, Diskin R, Klein F, Oliveira TY, Pietzsch J, Fenyo D, Abadir A, Velinzon K, Hurley A, Myung S, Boulad F, Poignard P, Burton DR, Pereyra F, Ho DD, Walker BD, Seaman MS, Bjorkman PJ, Chait BT, Nussenzweig MC.** 2011. Sequence and structural convergence of broad and potent HIV antibodies that mimic CD4 binding. *Science* **333**:1633-1637.
5. **Bonsignori M, Wiehe K, Grimm SK, Lynch R, Yang G, Kozink DM, Perrin F, Cooper AJ, Hwang KK, Chen X, Liu M, McKee K, Parks RJ, Eudailey J, Wang M, Clowse M, Criscione-Schreiber LG, Moody MA, Ackerman ME, Boyd SD, Gao F, Kelsoe G, Verkoczy L, Tomaras GD, Liao HX, Kepler TB, Montefiori DC, Mascola JR, Haynes BF.** 2014. An autoreactive antibody from an SLE/HIV-1 individual broadly neutralizes HIV-1. *J Clin Invest* **124**:1835-1843.
6. **Wu X, Zhou T, Zhu J, Zhang B, Georgiev I, Wang C, Chen X, Longo NS, Louder M, McKee K, O'Dell S, Perfetto S, Schmidt SD, Shi W, Wu L, Yang Y, Yang Z-Y, Yang Z, Zhang Z, Bonsignori M, Crump JA, Kapiga SH, Sam NE, Haynes BF, Simek M, Burton DR, Koff WC, Doria-Rose NA, Connors M, Program NCS, Mullikin JC, Nabel GJ, Roederer M, Shapiro L, Kwong PD, Mascola JR.** 2011. Focused Evolution of HIV-1 Neutralizing Antibodies Revealed by Structures and Deep Sequencing. *Science* **333**:1593-1602.
7. **Bonsignori M, Montefiori DC, Wu X, Chen X, Hwang KK, Tsao CY, Kozink DM, Parks RJ, Tomaras GD, Crump JA, Kapiga SH, Sam NE, Kwong PD, Kepler TB, Liao HX, Mascola JR, Haynes BF.** 2012. Two distinct broadly neutralizing antibody specificities of different clonal lineages in a single HIV-1-infected donor: implications for vaccine design. *J Virol* **86**:4688-4692.
8. **Liao H-X, Lynch R, Zhou T, Gao F, Alam SM, Boyd SD, Fire AZ, Roskin KM, Schramm CA, Zhang Z, Zhu J, Shapiro L, Mullikin JC, Gnanakaran S, Hraber P, Wiehe K, Kelsoe G, Yang G, Xia S-M, Montefiori DC, Parks R, Lloyd KE, Scarce RM, Soderberg KA, Cohen M, Kamanga G, Louder MK, Tran LM, Chen Y, Cai F, Chen S, Moquin S, Du X, Joyce MG, Srivatsan S, Zhang B, Zheng A, Shaw GM, Hahn BH, Kepler TB, Korber BTM, Kwong PD, Mascola JR, Haynes BF.** 2013. Co-evolution of a broadly neutralizing HIV-1 antibody and founder virus. *Nature* **496**:469-476.
9. **Xiao X, Chen W, Feng Y, Zhu Z, Prabakaran P, Wang Y, Zhang M-Y, Longo NS, Dimitrov DS.** 2009. Germline-like predecessors of broadly neutralizing antibodies lack measurable binding to HIV-1 envelope glycoproteins: Implications for evasion of immune responses and design of vaccine immunogens. *Biochemical and Biophysical Research Communications* **390**:404-409.
10. **Cardoso RMF, Zwick MB, Stanfield RL, Kunert R, Binley JM, Katinger H, Burton DR, Wilson IA.** 2005. Broadly Neutralizing Anti-HIV Antibody 4E10 Recognizes a Helical Conformation of a Highly Conserved Fusion-Associated Motif in gp41. *Immunity* **22**:163-173.
11. **Kunert R, Wolbank S, Stiegler G, Weik R, Katinger H.** 2004. Characterization of molecular features, antigen-binding, and in vitro properties of IgG and IgM variants of 4E10, an anti-HIV type 1 neutralizing monoclonal antibody. *AIDS research and human retroviruses* **20**:755-762.

12. **Morris L, Chen X, Alam M, Tomaras G, Zhang R, Marshall DJ, Chen B, Parks R, Foulger A, Jaeger F, Donathan M, Bilska M, Gray ES, Abdool Karim SS, Kepler TB, Whitesides J, Montefiori D, Moody MA, Liao HX, Haynes BF.** 2011. Isolation of a human anti-HIV gp41 membrane proximal region neutralizing antibody by antigen-specific single B cell sorting. *PLoS One* **6**:e23532.
13. **Huang J, Ofek G, Laub L, Louder MK, Doria-Rose NA, Longo NS, Imamichi H, Bailer RT, Chakrabarti B, Sharma SK, Alam SM, Wang T, Yang Y, Zhang B, Migueles SA, Wyatt R, Haynes BF, Kwong PD, Mascola JR, Connors M.** 2012. Broad and potent neutralization of HIV-1 by a gp41-specific human antibody. *Nature advance online publication*.
14. **McLellan JS, Pancera M, Carrico C, Gorman J, Julien J-P, Khayat R, Louder R, Pejchal R, Sastry M, Dai K, O'Dell S, Patel N, Shahzad-ul-Hussan S, Yang Y, Zhang B, Zhou T, Zhu J, Boyington JC, Chuang G-Y, Diwanji D, Georgiev I, Do Kwon Y, Lee D, Louder MK, Moquin S, Schmidt SD, Yang Z-Y, Bonsignori M, Crump JA, Kapiga SH, Sam NE, Haynes BF, Burton DR, Koff WC, Walker LM, Phogat S, Wyatt R, Orwenyo J, Wang L-X, Arthos J, Bewley CA, Mascola JR, Nabel GJ, Schief WR, Ward AB, Wilson IA, Kwong PD.** 2011. Structure of HIV-1 gp120 V1/V2 domain with broadly neutralizing antibody PG9. *Nature* **480**:336-343.
15. **Walker LM, Phogat SK, Chan-Hui P-Y, Wagner D, Phung P, Goss JL, Wrin T, Simek MD, Fling S, Mitcham JL, Lehrman JK, Priddy FH, Olsen OA, Frey SM, Hammond PW, Investigators PGP, Kaminsky S, Zamb T, Moyle M, Koff WC, Poignard P, Burton DR.** 2009. Broad and Potent Neutralizing Antibodies from an African Donor Reveal a New HIV-1 Vaccine Target. *Science* **326**:285-289.
16. **Pancera M, McLellan JS, Wu X, Zhu J, Changela A, Schmidt SD, Yang Y, Zhou T, Phogat S, Mascola JR, Kwong PD.** 2010. Crystal Structure of PG16 and Chimeric Dissection with Somatic Related PG9: Structure-Function Analysis of Two Quaternary-Specific Antibodies That Effectively Neutralize HIV-1. *Journal of virology* **84**:8098-8110.
17. **Bonsignori M, Hwang K-K, Chen X, Tsao C-Y, Morris L, Gray E, Marshall DJ, Crump JA, Kapiga SH, Sam NE, Sinangil F, Pancera M, Yongping Y, Zhang B, Zhu J, Kwong PD, O'Dell S, Mascola JR, Wu L, Nabel GJ, Phogat S, Seaman MS, Whitesides JF, Moody MA, Kelsoe G, Yang X, Sodroski J, Shaw GM, Montefiori DC, Kepler TB, Tomaras GD, Alam SM, Liao H-X, Haynes BF.** 2011. Analysis of a Clonal Lineage of HIV-1 Envelope V2/V3 Conformational Epitope-Specific Broadly Neutralizing Antibodies and Their Inferred Unmutated Common Ancestors. *Journal of virology* **85**:9998-10009.
18. **Walker LM, Huber M, Doores KJ, Falkowska E, Pejchal R, Julien JP, Wang SK, Ramos A, Chan-Hui PY, Moyle M, Mitcham JL, Hammond PW, Olsen OA, Phung P, Fling S, Wong CH, Phogat S, Wrin T, Simek MD, Koff WC, Wilson IA, Burton DR, Poignard P.** 2011. Broad neutralization coverage of HIV by multiple highly potent antibodies. *Nature* **477**:466-470.
19. **Scanlan CN, Pantophlet R, Wormald MR, Ollmann Saphire E, Stanfield R, Wilson IA, Katinger H, Dwek RA, Rudd PM, Burton DR.** 2002. The broadly neutralizing anti-human immunodeficiency virus type 1 antibody 2G12 recognizes a cluster of alpha1-->2 mannose residues on the outer face of gp120. *Journal of virology* **76**:7306-7321.
20. **Kunert R, Ruker F, Katinger H.** 1998. Molecular characterization of five neutralizing anti-HIV type 1 antibodies: identification of nonconventional D segments in the human monoclonal antibodies 2G12 and 2F5. *AIDS Res Hum Retroviruses* **14**:1115-1128.
21. **Liao HX, Bonsignori M, Alam SM, McLellan JS, Tomaras GD, Moody MA, Kozink DM, Hwang KK, Chen X, Tsao CY, Liu P, Lu X, Parks RJ, Montefiori DC, Ferrari G, Pollara J, Rao M, Peachman KK, Santra S, Letvin NL, Karasavvas N, Yang ZY, Dai K, Pancera M, Gorman J, Wiehe K, Nicely NI, Rerks-Ngarm S, Nitayaphan S, Kaewkungwal J, Pitisuttithum P, Tartaglia J, Sinangil F, Kim JH, Michael NL, Kepler TB, Kwong PD, Mascola JR, Nabel GJ, Pinter A, Zolla-Pazner S, Haynes BF.** 2013. Vaccine induction of antibodies against a structurally heterogeneous site of immune pressure within HIV-1 envelope protein variable regions 1 and 2. *Immunity* **38**:176-186.

22. **Wyatt R, Moore J, Accola M, Desjardin E, Robinson J, Sodroski J.** 1995. Involvement of the V1/V2 variable loop structure in the exposure of human immunodeficiency virus type 1 gp120 epitopes induced by receptor binding. *J Virol* **69**:5723-5733.
23. **Moore JP, Trkola A, Korber B, Boots LJ, Kessler JA, Mccutchan FE, Mascola J, Ho DD, Robinson J, Conley AJ.** 1995. A Human Monoclonal-Antibody to a Complex Epitope in the V3 Region of Gp120 of Human-Immunodeficiency-Virus Type-1 Has Broad Reactivity within and Outside Clade-B. *Journal of Virology* **69**:122-130.
24. **Scott CF, Silver S, Profy AT, Putney SD, Langlois A, Weinhold K, Robinson JE.** 1990. Human Monoclonal-Antibody That Recognizes the V3-Region of Human Immunodeficiency Virus-Gp120 and Neutralizes the Human T-Lymphotropic Virus Type-II Strain. *P Natl Acad Sci USA* **87**:8597-8601.
25. **Moore JP, Sodroski J.** 1996. Antibody cross-competition analysis of the human immunodeficiency virus type 1 gp120 exterior envelope glycoprotein. *J Virol* **70**:1863-1872.
26. **Mascola JR, Haynes BF.** 2013. HIV-1 neutralizing antibodies: understanding nature's pathways. *Immunol Rev* **254**:225-244.
